# Supplementary material for: Homologous chromosomes are stably conjoined for Drosophila male meiosis I by SUM, a multimerized protein assembly with modules for DNA-binding and for separase-mediated dissociation co-opted from cohesin
Source: PubMed Central journal article supplement (PMC9767379; doi:10.1371/journal.pgen.1010547), 2022-12-08

|                                |     |       |        |          |       |       |      |       |        |      |       |      |              |          |       |       |      |        |          |        |            |        |          |        |       |       |     |
|--------------------------------|-----|-------|--------|----------|-------|-------|------|-------|--------|------|-------|------|--------------|----------|-------|-------|------|--------|----------|--------|------------|--------|----------|--------|-------|-------|-----|
| <i>Dmel_uno_Q7JQU5</i>         | 284 | MKVEV | RNRKL  | IVDTKKT  | LAVHD | PRK   | ---  | LSGS  | ITMKK  | IIR  | -     | KQVT | GKTRKQFEAL   | KVTFD    | LLN   | LCVA  | -    | NI     | SDDLTKQF | QKACA  | 364        |        |          |        |       |       |     |
| <i>Dere_uno_B3N989</i>         | 277 | MKMEV | RYRKL  | IVDTKKT  | LAAND | PSK   | ---  | SPGP  | ITMKK  | IIR  | -     | KQVT | GKTRKQFEAL   | KVTFD    | LLN   | LCVG  | -    | NI     | SEDLVKQF | QKACA  | 357        |        |          |        |       |       |     |
| <i>Dpse_uno_B5E0X5</i>         | 273 | MHIEV | RRRN   | FLEDRHKT | IEPYD | LQN   | ---  | TVSS  | PVQKE  | I IQ | -     | RQVT | AKTKQFDAL    | KITAF    | DLLT  | SAQG  | -    | KI     | AEELVQQF | QACI   | 353        |        |          |        |       |       |     |
| <i>Ccap_uno_XP_004534901</i>   | 290 | YKLEF | KRRKL  | IVDPKTI  | ITPKT | FKQQ  | -    | HS    | TAHLS  | ARS  | PER   | -    | LC           | STTSRKFE | ISKKA | FDML  | TAPS | RARMMS | AKLTQQF  | KKSCV  | 373        |        |          |        |       |       |     |
| <i>Bdor_uno_XP_011209745</i>   | 288 | YKLEI | KRRKI  | IVDPKTT  | ITPKT | FKQQ  | -    | YS    | AHLR   | KS   | PDRF  | -    | FA           | AAKDRKYE | INRKT | AFDML | TEPS | R      | VMSS     | KLTTQF | KKACV      | 371    |          |        |       |       |     |
| <i>Mdom_uno_A0A118NCZ4</i>     | 277 | HRIEV | RKRKL  | LVDPKVR  | ISRAL | KRQ   | QQQ  | PATN  | SLQKS  | VLG  | -     | PS   | ISFTSLQKRHKT | PMS      | AFLL  | NSIN  | RSQC | MSNKL  | KELFR    | RCV    | 362        |        |          |        |       |       |     |
| <i>Hsap_Rad21_NP_006256</i>    | 315 | ETKAK | RKRKL  | IVDSVKE  | LDSTI | RAQL  | -    | SDYSD | IVTTLD | LA   | -     | PP   | TKKLMW       | KETG     | -     | -     | GVEK | LF     | PAQP     | -      | LWNNRLLKLF | TRCLT  | 394      |        |       |       |     |
| <i>Mmus_Rad21_NP_033035</i>    | 315 | ETKAK | RKRKL  | IVDSVKE  | LDSTI | RAQL  | -    | SDYSD | IVTTLD | LA   | -     | PP   | TKKLMW       | KETG     | -     | -     | GVEK | LF     | PAQP     | -      | LWNNRLLKLF | TRCLT  | 394      |        |       |       |     |
| <i>Dmel_Rad21_NP_001015132</i> | 326 | VTKAK | RKRKL  | IIDEIKN  | ISGEE | MKAOL | -    | ADTSD | ILTTLD | LA   | -     | PP   | TKRLMY       | WKETG    | -     | -     | GVEK | LF     | PSRS     | -      | I          | PARALF | GNYNRQLF | 405    |       |       |     |
| <i>Hsap_Rad21_NP_001130038</i> | 289 | EKRK  | GKRRLL | IDPIKEL  | SSKV  | IHKQL | -    | TS    | FAD    | TLMV | LELA  | -    | PP           | QRLMMW   | KKRG  | -     | -    | GVTLL  | STAAQD   | -      | L          | HAE    | LKMLFT   | KCFL   | 368   |       |     |
| <i>Mmus_Rad21_NP_001263329</i> | 288 | DRRRR | KRRLL  | VDVKE    | ISSK  | MHRQL | -    | ASF   | MD     | TLMV | LDLA  | -    | PP           | QRLMMW   | KKRG  | -     | -    | GVDML  | STATQD   | -      | L          | INDEL  | KMLFT    | KCFL   | 367   |       |     |
| <i>Hsap_Rec8_NP_005123</i>     | 297 | PRRRR | RRRLL  | FWDKETQ  | ISPEK | FQEQL | -    | Q     | TRAH   | CWEC | PMVQ  | -    | PP           | ERTIR    | -     | -     | -    | -      | GP       | ELFRT  | PTLS       | GWLP   | PELLGL   | WTHCAQ | 371   |       |     |
| <i>Mmus_Rec8_NP_064386</i>     | 338 | PRRRR | RRRQL  | FWDKETQ  | ISREK | FEEQL | -    | Q     | GAH    | CWEY | PVAQ  | -    | PP           | KRMLT    | -     | -     | -    | -      | SP       | ELFRT  | PTLS       | GWLP   | PELLGL   | WTHCAQ | 412   |       |     |
| <i>Dmel_C(2)m_NP_609788</i>    | 322 | SHPKN | RKRKL  | IVDKRIE  | YTR   | REQLV | KHRQ | -     | KYMEE  | YLS  | RNVIV | -    | PK           | SDLRK    | -     | -     | -    | -      | PK       | ELLC   | KLYNN      | -      | -        | VS     | FLALH | NHSGP | 394 |

interaction residues  
secondary structure

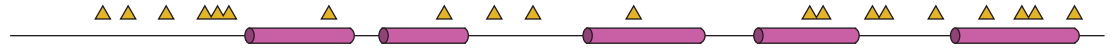

Supplement: pgen.1010547.s002.pdf [file pgen.1010547.s002.pdf]
