# Supplementary material for: Homologous chromosomes are stably conjoined for Drosophila male meiosis I by SUM, a multimerized protein assembly with modules for DNA-binding and for separase-mediated dissociation co-opted from cohesin
Source: PubMed Central journal article supplement (PMC9767379; doi:10.1371/journal.pgen.1010547), 2022-12-08

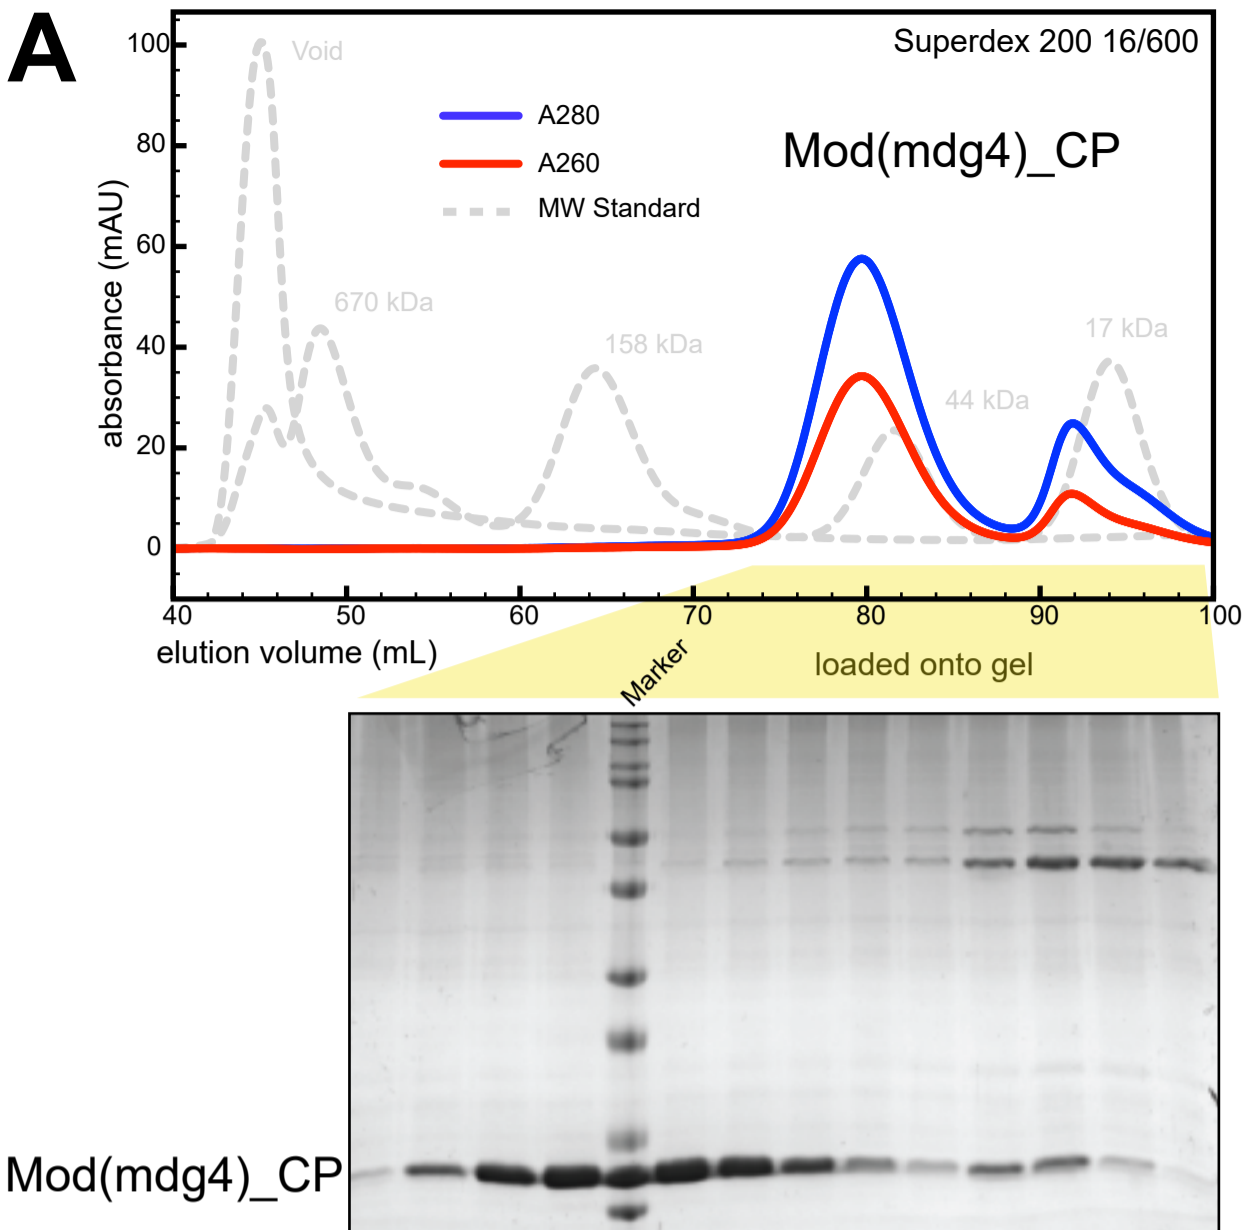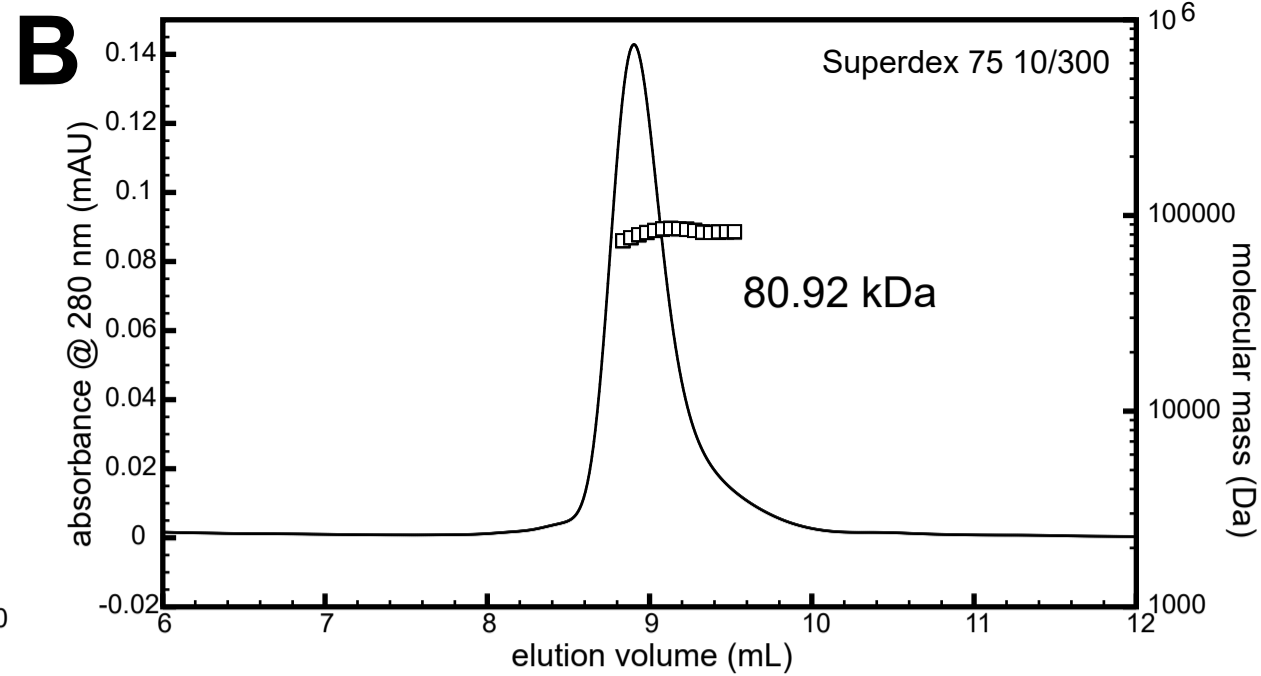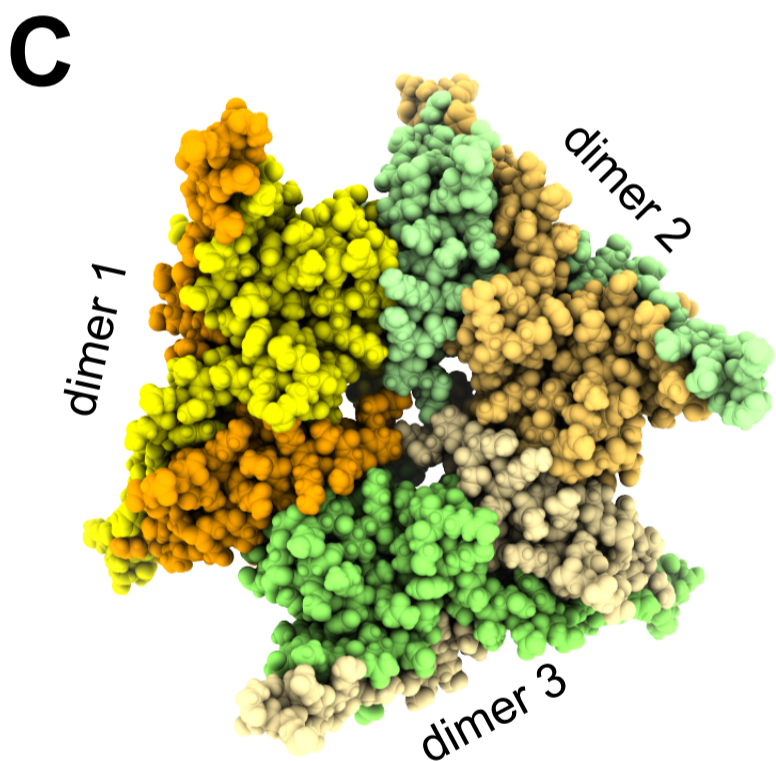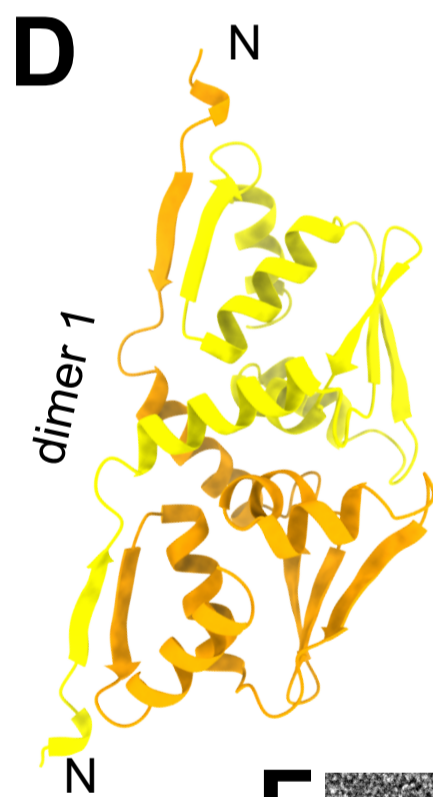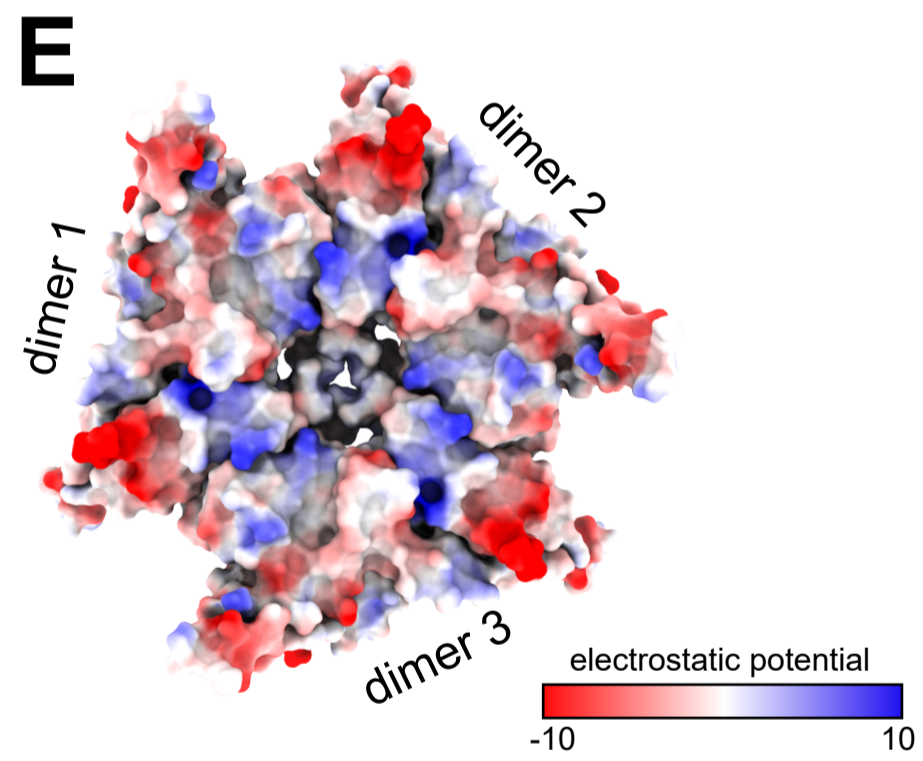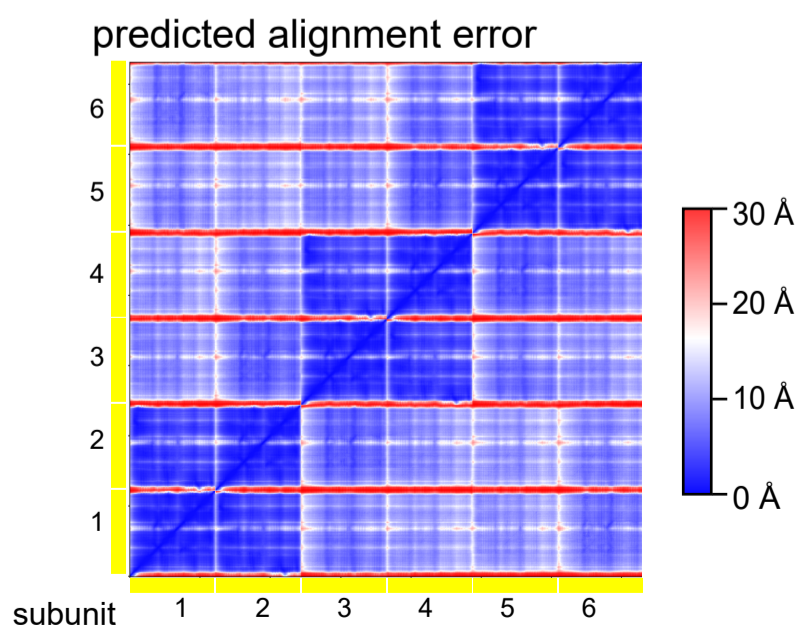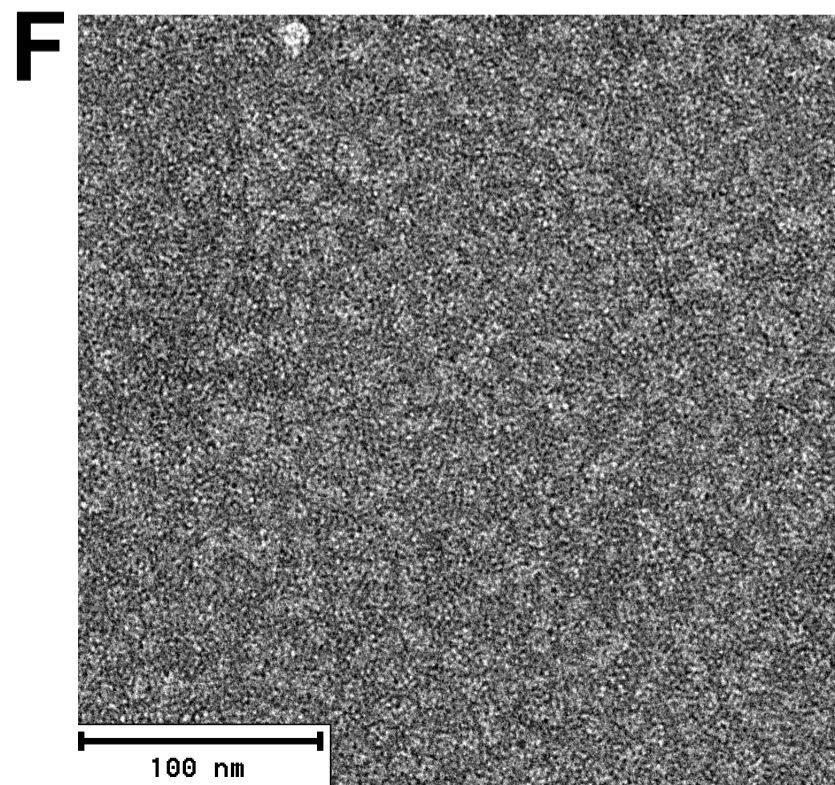

Supplement: pgen.1010547.s005.pdf [file pgen.1010547.s005.pdf]
