# Supplementary material for: Homologous chromosomes are stably conjoined for Drosophila male meiosis I by SUM, a multimerized protein assembly with modules for DNA-binding and for separase-mediated dissociation co-opted from cohesin
Source: PubMed Central journal article supplement (PMC9767379; doi:10.1371/journal.pgen.1010547), 2022-12-08

pre-bleach: 5 time points at 1 min intervals  
bleach: 3.2 sec  
post-bleach: 15 time points at 1 min intervals

post-bleach: 15 time points at 5 min intervals

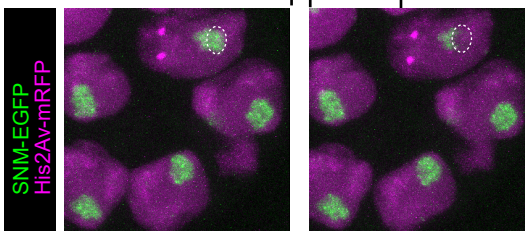

SNM-EGFP

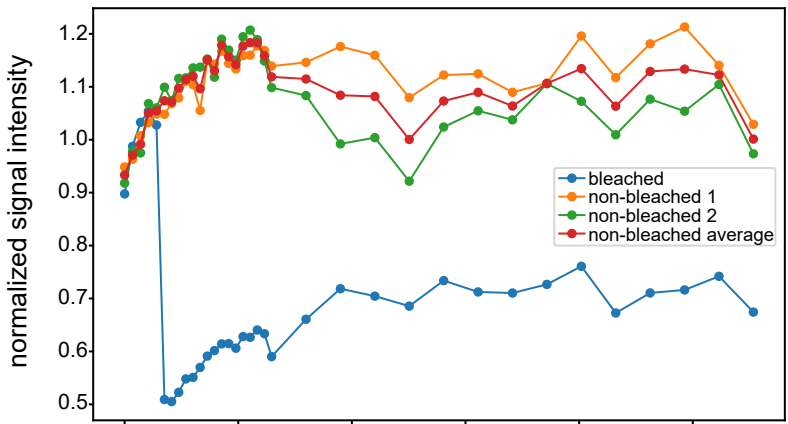

UNO-EGFP

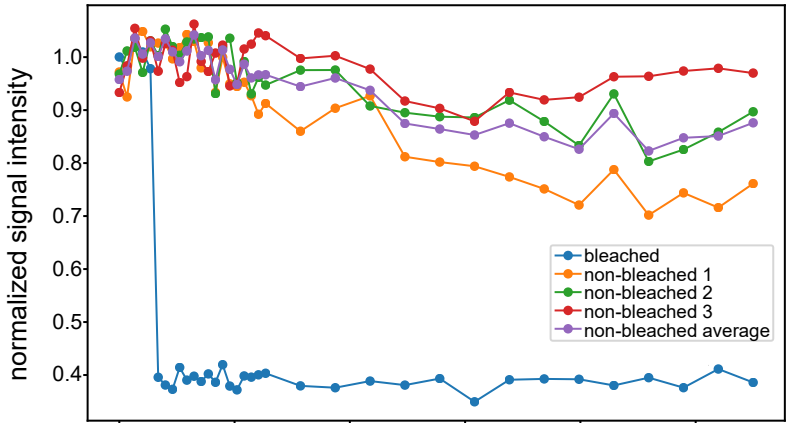

MNM-EGFP

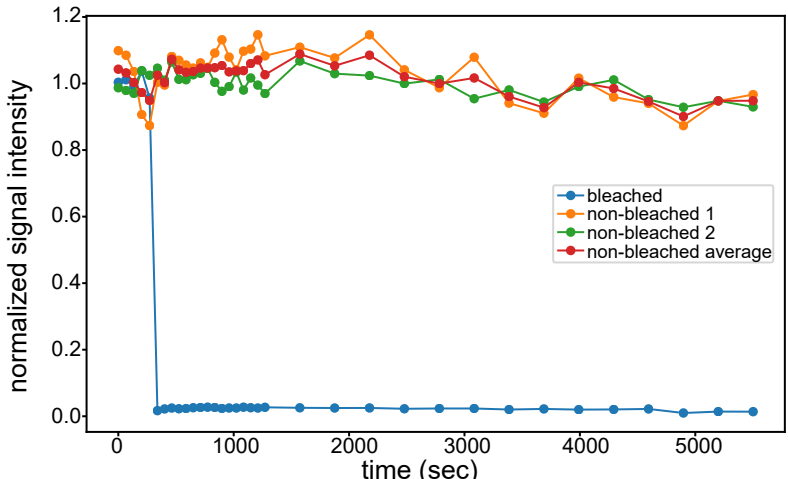

Supplement: pgen.1010547.s006.pdf [file pgen.1010547.s006.pdf]
