# Supplementary material for: Homologous chromosomes are stably conjoined for Drosophila male meiosis I by SUM, a multimerized protein assembly with modules for DNA-binding and for separase-mediated dissociation co-opted from cohesin
Source: PubMed Central journal article supplement (PMC9767379; doi:10.1371/journal.pgen.1010547), 2022-12-08

**A** *bam* > *uno*<sup>T128A</sup>-EGFP in *uno* null

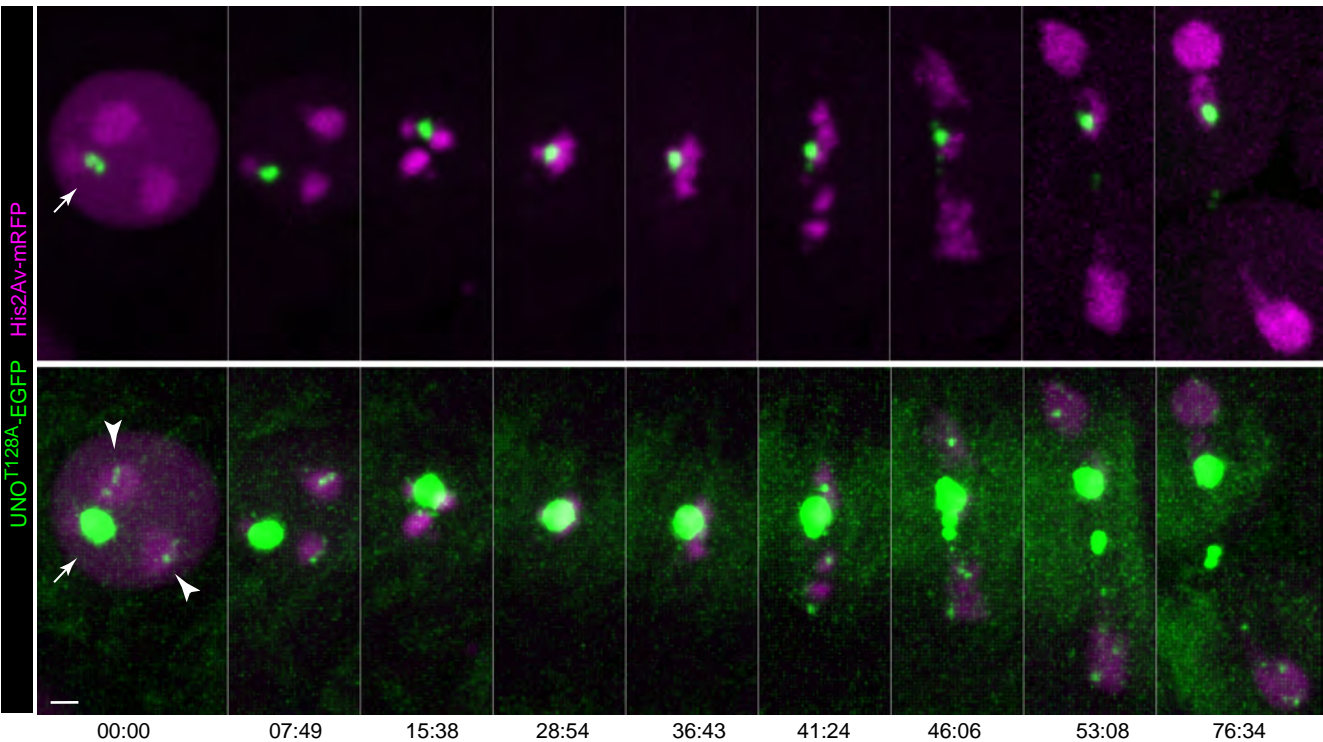

**B** *bam* > *uno*<sup>T128D</sup>-EGFP in *uno* null

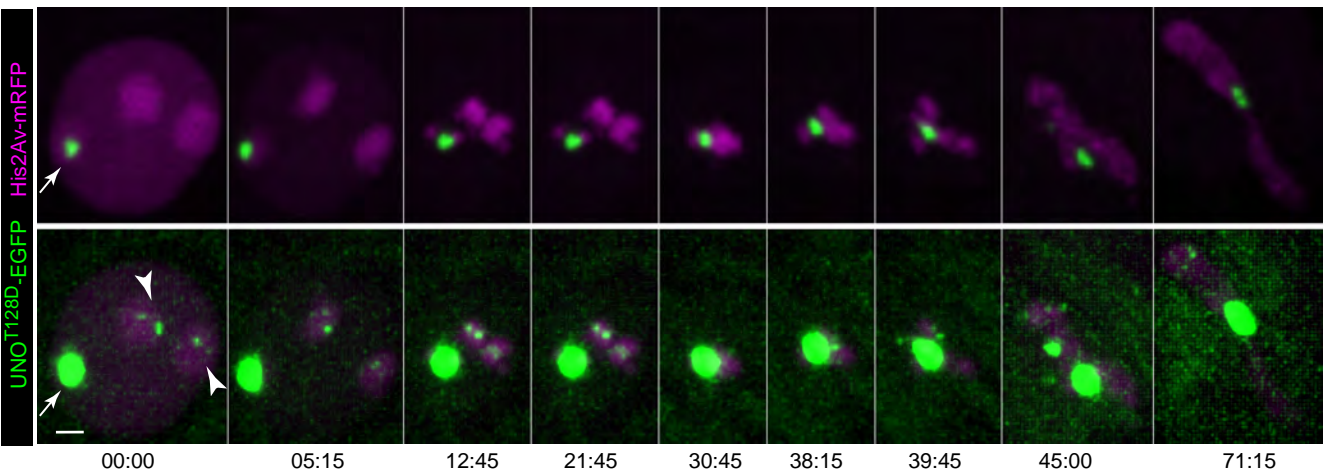

Supplement: pgen.1010547.s009.pdf [file pgen.1010547.s009.pdf]
